# Supplementary material for: Good Things Come in Larger Packages: Size Matters for Adult Fruit-Feeding Butterfly Dispersal and Larval Diet Breadth
Source: MDPI journal article supplement (doi:10.3390/d13120664), 2021-12-12
Supplement: s1 [file s1]

((colobura\_dirce:37.25384562,smyrna\_blomfieldia:37.25384561)node123:28.50025115,((hamadryas\_feronia:6.667260696,(hamadryas\_amphinome:3.333630382,hamadryas\_februa:3.333630348)node206:3.333630348)node205:33.2840992,(catonephele\_acontius:36.72468409,((temenis\_laothoe:6.56542425,temenis\_huebneri:6.565424311)node224:23.91032064,(callicore\_sorana:16.50775023,paulogramma\_pygas:16.50775024)node229:13.96799467)node219:6.248939205)node213:3.226675799)node183:25.80273686)node113:19.59701172,(((prepona\_claudina:33.61434338,archaeoprepona\_demophon:33.61434332)node269:13.31632835,(memphis\_acidalia:36.92094951,zaretis\_strigosus:36.9209495)node285:10.00972217)node268:23.41547041,(((yphthimoides\_renata:26.46846728,paryphthimoides\_phronius:26.46846723)node356:8.663262029,((pareuptychia\_ocirrhoe:26.51651472,paryphthimoides\_poltys:26.51651472)node393:1.496738696,(forsterinaria\_quantius:19.2664222,((taygetis\_virgilia:1.204151388,taygetis\_rufomarginata:1.204151448)node457:7.224908327,taygetis\_mermeria:8.429059775)node449:10.83736248)node436:8.7468312)node392:7.118475843)node354:25.57855352,(((eryphanis\_automedon:13.61223344,caligo\_illioneus:13.61223341)node563:17.10781503,(catoblepia\_berecynthia:21.35144756,opsiphanes\_invirae:21.35144756)node574:9.368600886)node548:17.81178109,morpho\_helenor:48.53182953)node545:12.17845325)node311:9.635859318)node266:15.00496639)node57;
